# Supplementary material for: Dogs with Bilateral Medial Coronoid Disease Can Be Clinically Sound after Unilateral Arthroscopic Fragment Removal—Preliminary Study
Source: MDPI journal article supplement (doi:10.3390/ani13243803), 2023-12-09

Provided figure with sample radiographic images of each of the four grades of elbow dysplasia included in Tables 2 + 3

**Table 2.** - Modified Elbow Dysplasia Scoring

| Modified Elbow Dysplasia Scoring | Radiographic Findings                                                                                                 |
|----------------------------------|-----------------------------------------------------------------------------------------------------------------------|
| 0                                | Normal elbow joint: No evidence of sclerosis or arthrosis                                                             |
| 1                                | Mild arthrosis: Presence of osteophytes < 2 mm high. Minor sclerosis of the base of the coronoid processes.           |
| 2                                | Moderate arthrosis: Presence of osteophytes of 2 - 5 mm high. Obvious sclerosis of the base of the coronoid processes |
| 3                                | Severe arthrosis: Presence of osteophytes of > 5 mm high).                                                            |

### Modified Elbow Dysplasia Scoring - Grade 0

Radiograph of a left elbow in a mediolateral flexed view

Grade 0: Normal elbow joint - No evidence of sclerosis or arthrosis

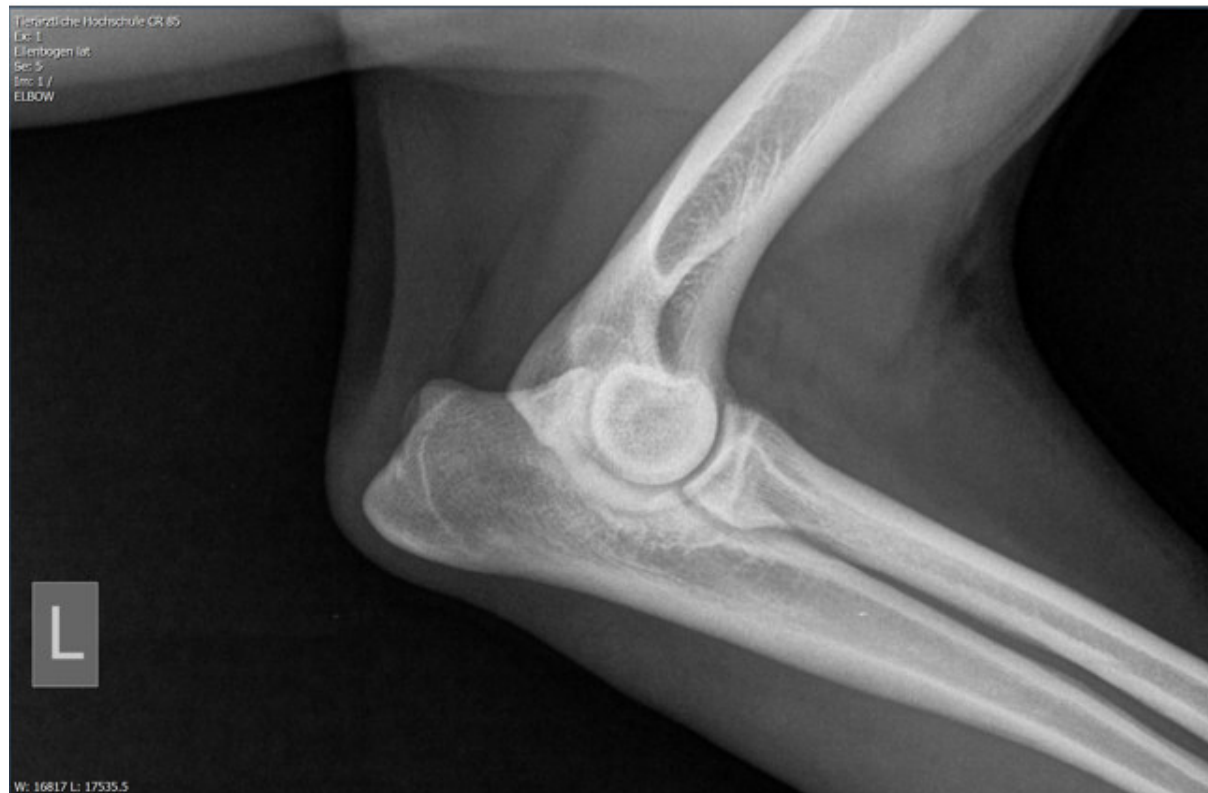

Radiograph of a left elbow in a craniocaudal view  
Grade 0: Normal elbow joint - No evidence of sclerosis or arthrosis

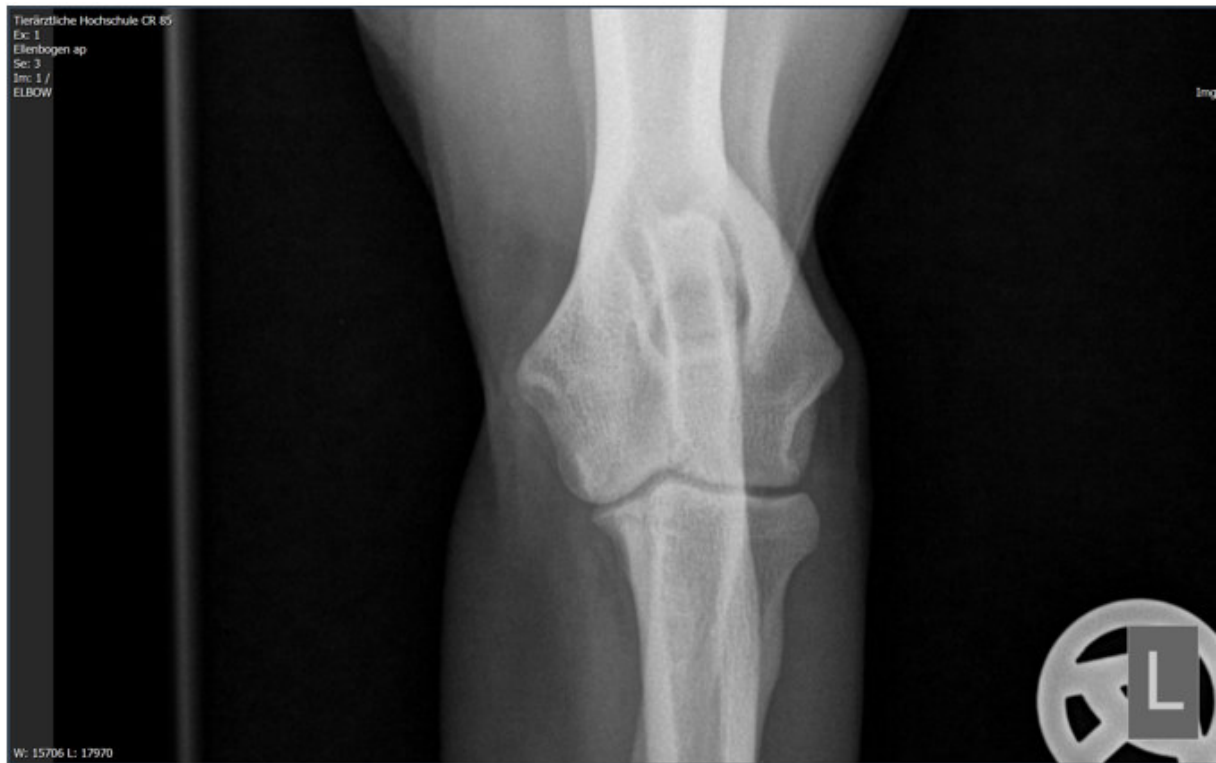

## Modified Elbow Dysplasia Scoring - Grade 1

Radiograph of a right elbow in a mediolateral flexed view

Grade 1: Mild arthrosis - Presence of osteophytes < 2 mm high. Minor sclerosis of the base of the coronoid processes

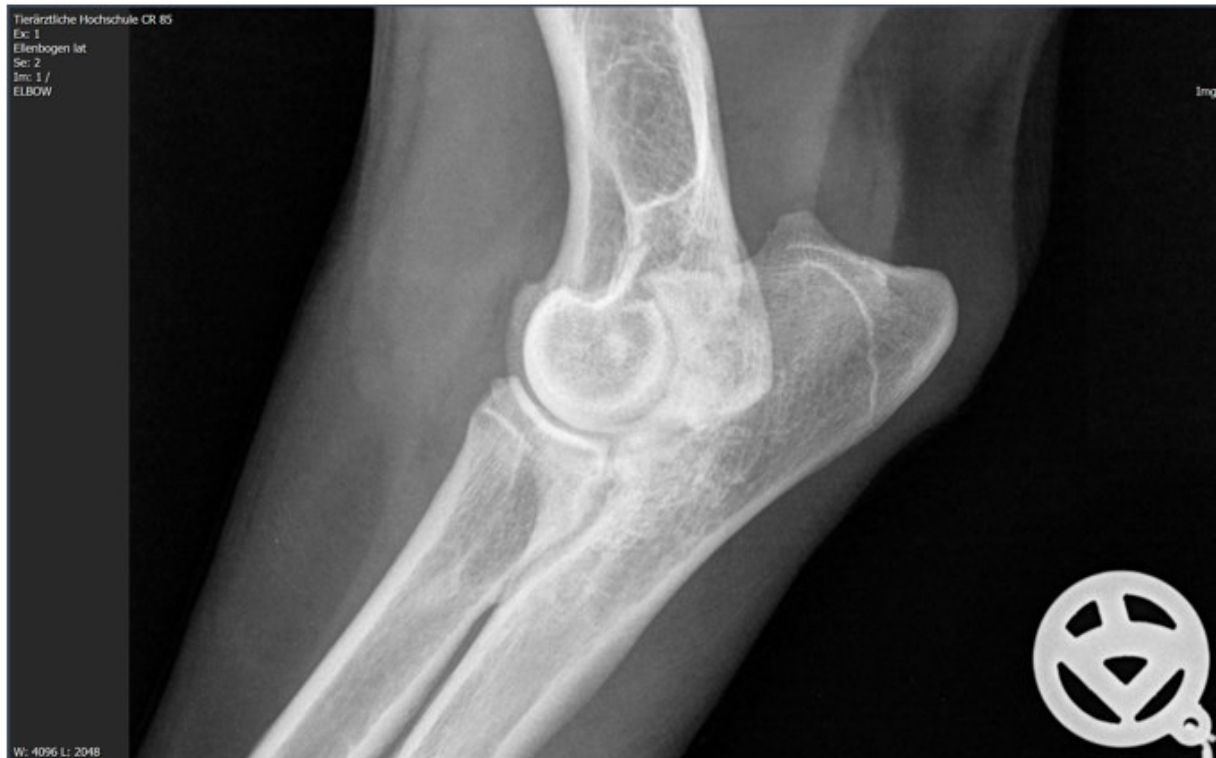

Radiograph of a right elbow in a mediolateral flexed view

Grade 1: Mild arthrosis - Presence of osteophytes < 2 mm high (shown in the measurement). Minor sclerosis of the base of the coronoid processes

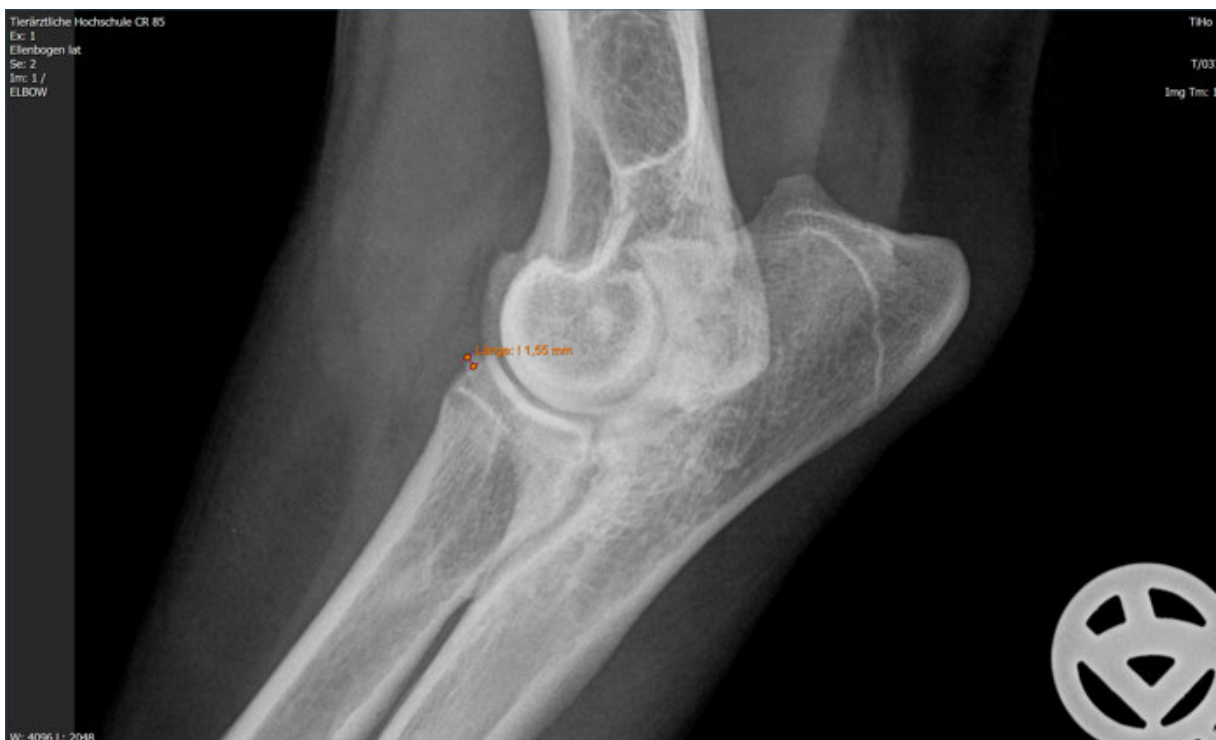

Radiograph of a right elbow in a craniocaudal view

Grade 1: Mild arthrosis - Presence of osteophytes < 2 mm high. Minor sclerosis of the base of the coronoid processes

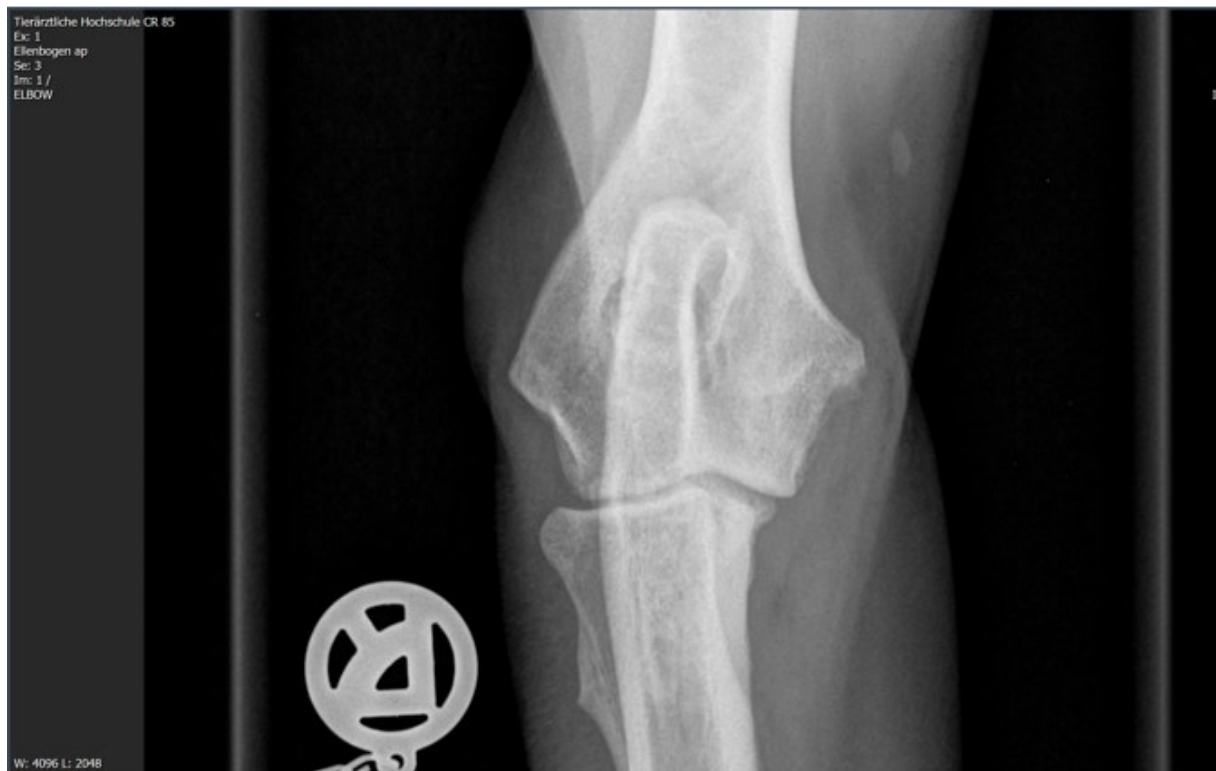

Radiograph of a right elbow in a craniocaudal view

Grade 1: Mild arthrosis - Presence of osteophytes < 2 mm high (shown in the measurement). Minor sclerosis of the base of the coronoid processes

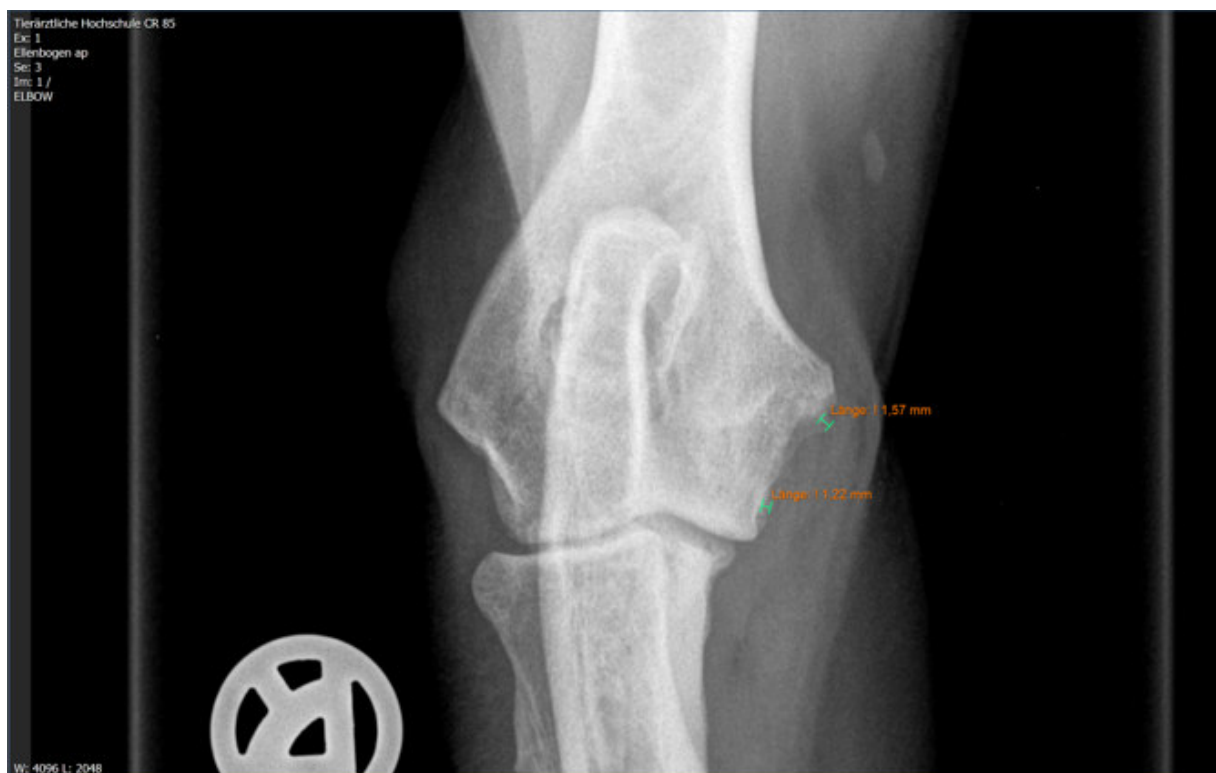

## Modified Elbow Dysplasia Scoring – Grade 2

Radiograph of a left elbow in a mediolateral flexed view

Grade 2: Moderate arthrosis - Presence of osteophytes of 2 - 5 mm high. Obvious sclerosis of the base of the coronoid processes

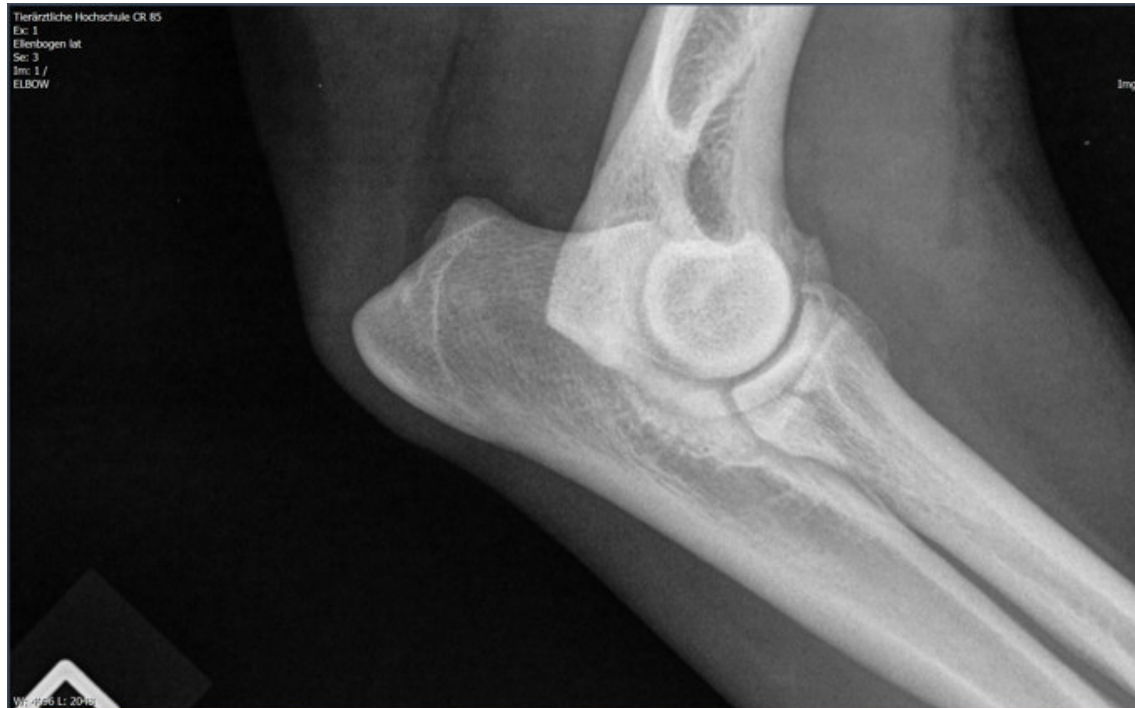

Radiograph of a left elbow in a mediolateral flexed view

Grade 2: Moderate arthrosis - Presence of osteophytes of 2 - 5 mm high (shown in the measurement). Obvious sclerosis of the base of the coronoid processes

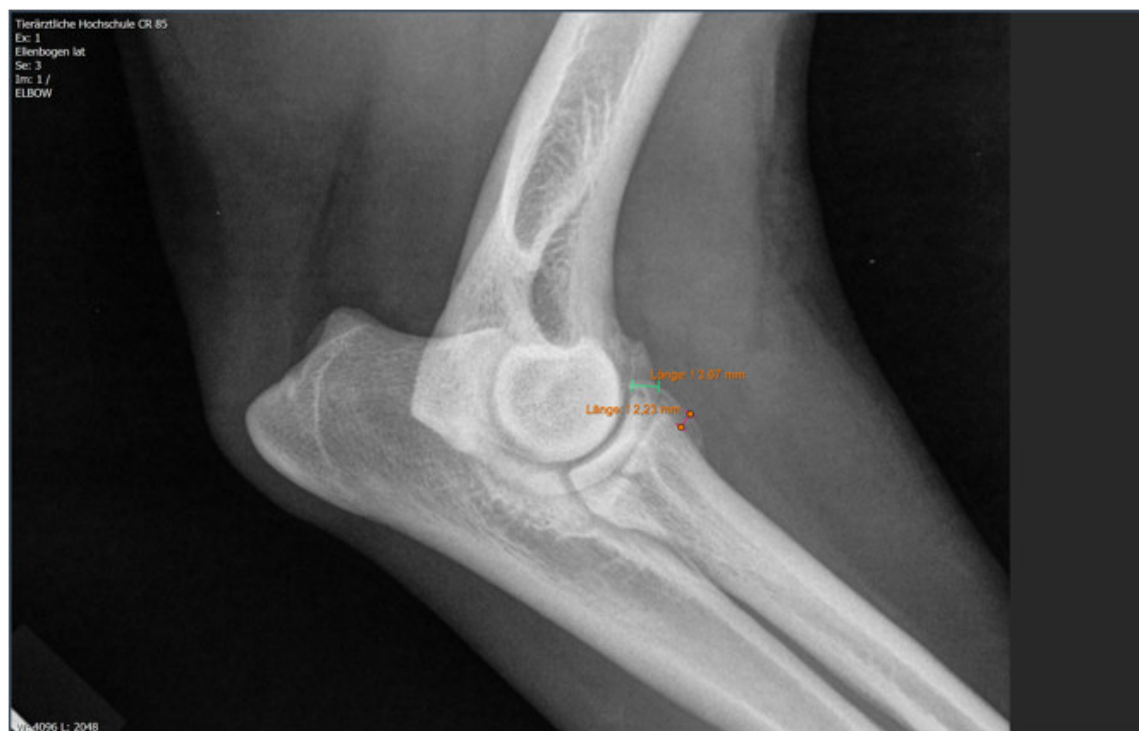



Radiograph of a left elbow in a craniocaudal view

Grade 2: Moderate arthrosis - Presence of osteophytes of 2 - 5 mm high. Obvious sclerosis of the base of the coronoid processes

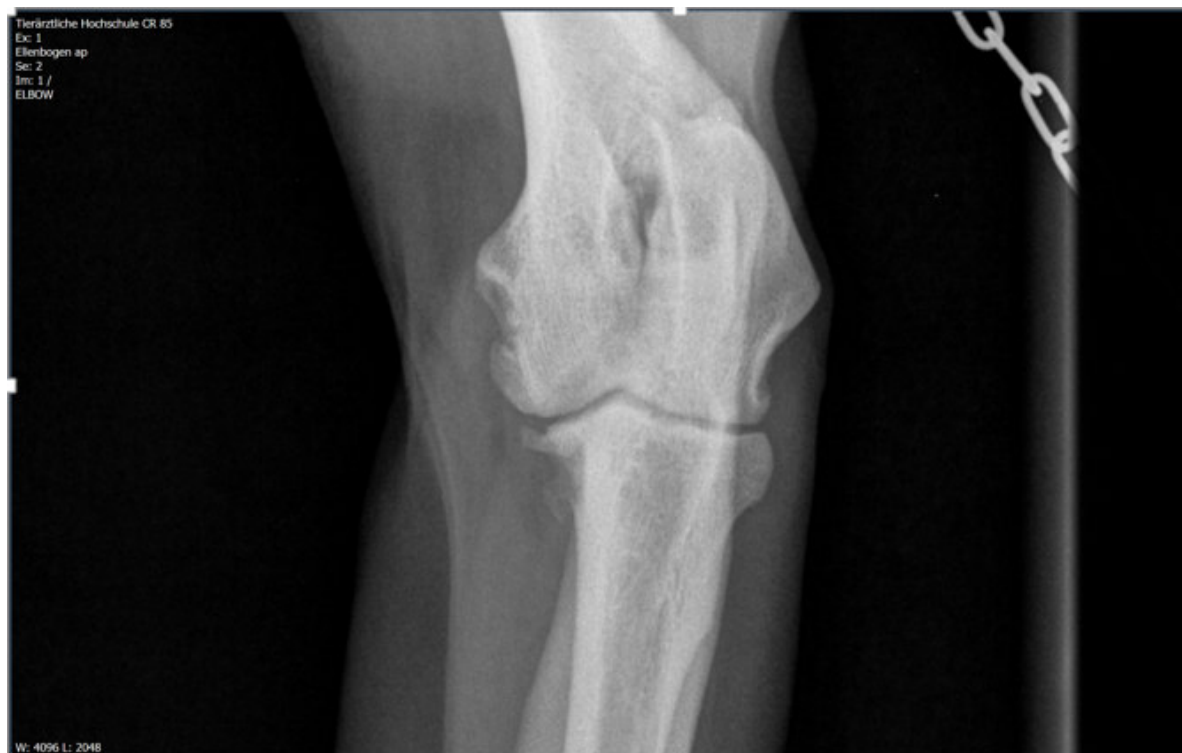

Radiograph of a left elbow in a craniocaudal view

Grade 2: Moderate arthrosis - Presence of osteophytes of 2 - 5 mm high (shown in the measurement). Obvious sclerosis of the base of the coronoid processes

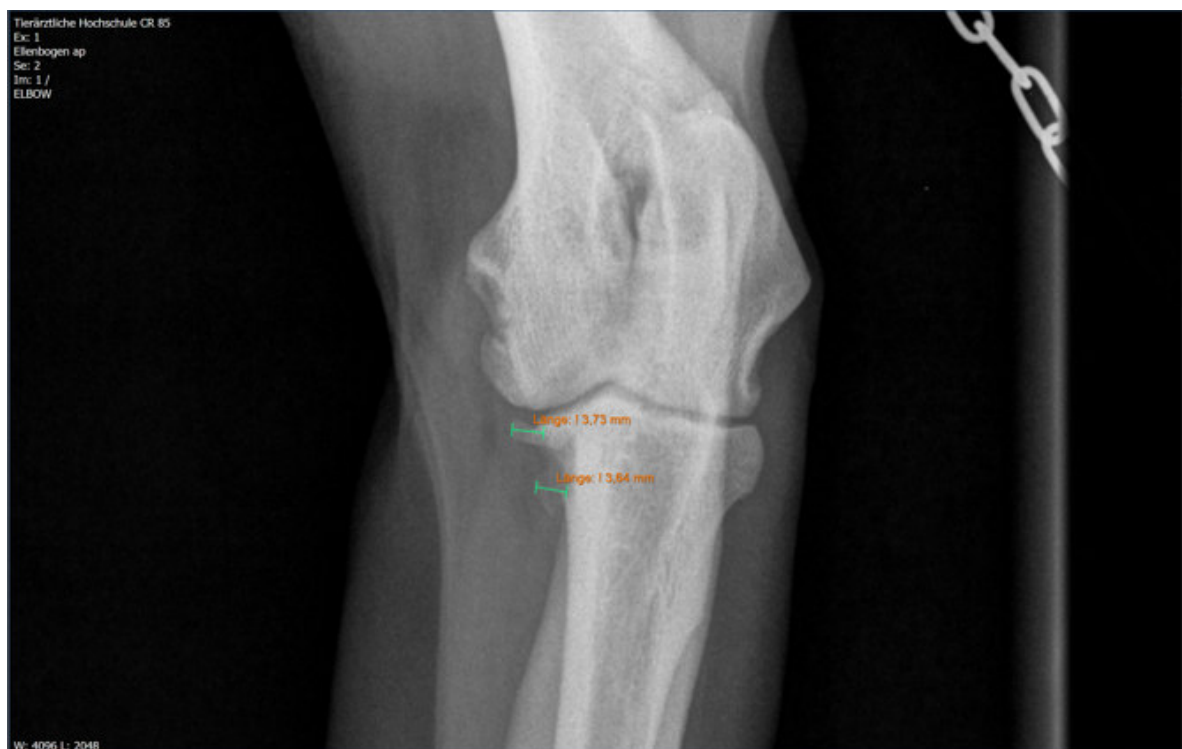

### Modified Elbow Dysplasia Scoring – Grade 3

Radiograph of a right elbow in a mediolateral flexed view

Grade 3: Severe arthrosis - Presence of osteophytes of  $> 5$  mm high.

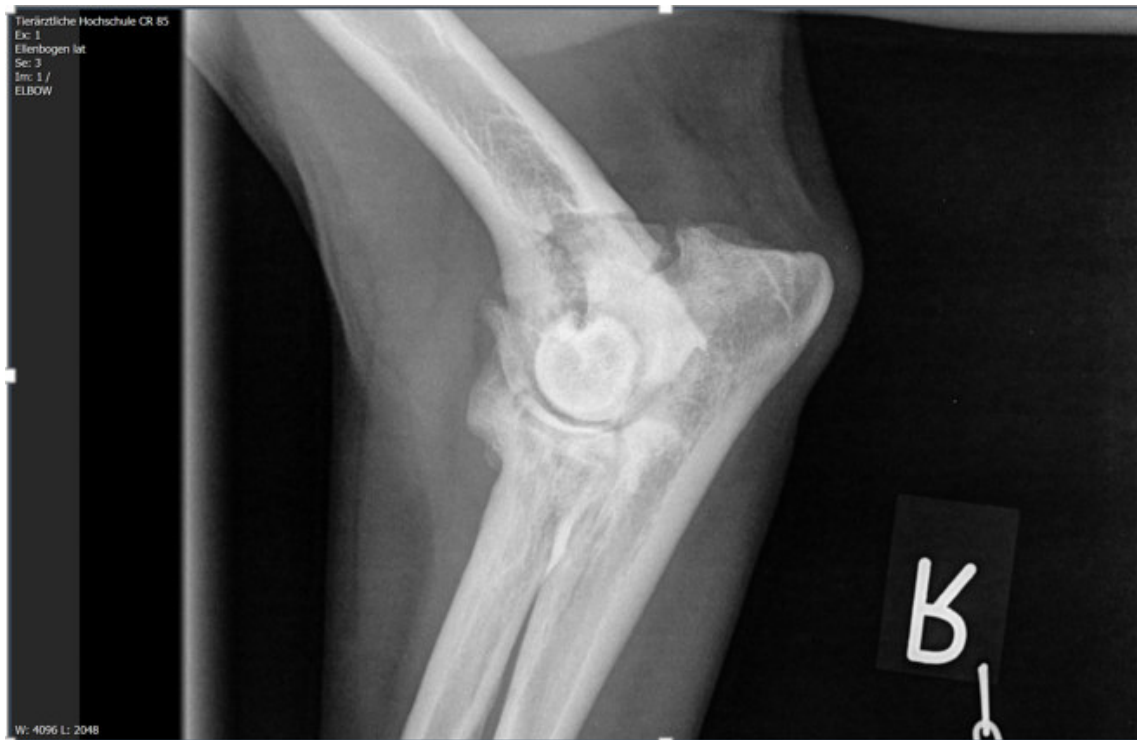

Radiograph of a right elbow in a mediolateral flexed view

Grade 3: Severe arthrosis - Presence of osteophytes of  $> 5$  mm high (shown in the measurement).

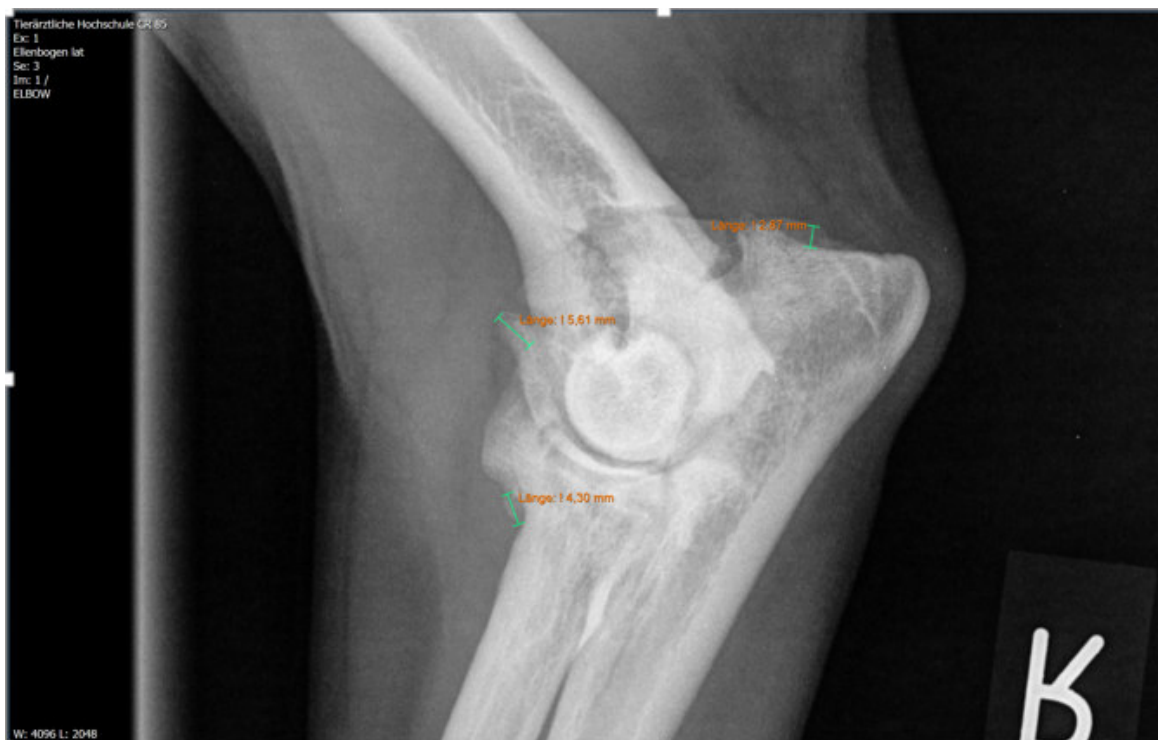

Radiograph of a right elbow in a craniocaudal view  
Grade 3: Severe arthrosis - Presence of osteophytes of  $> 5$  mm high.

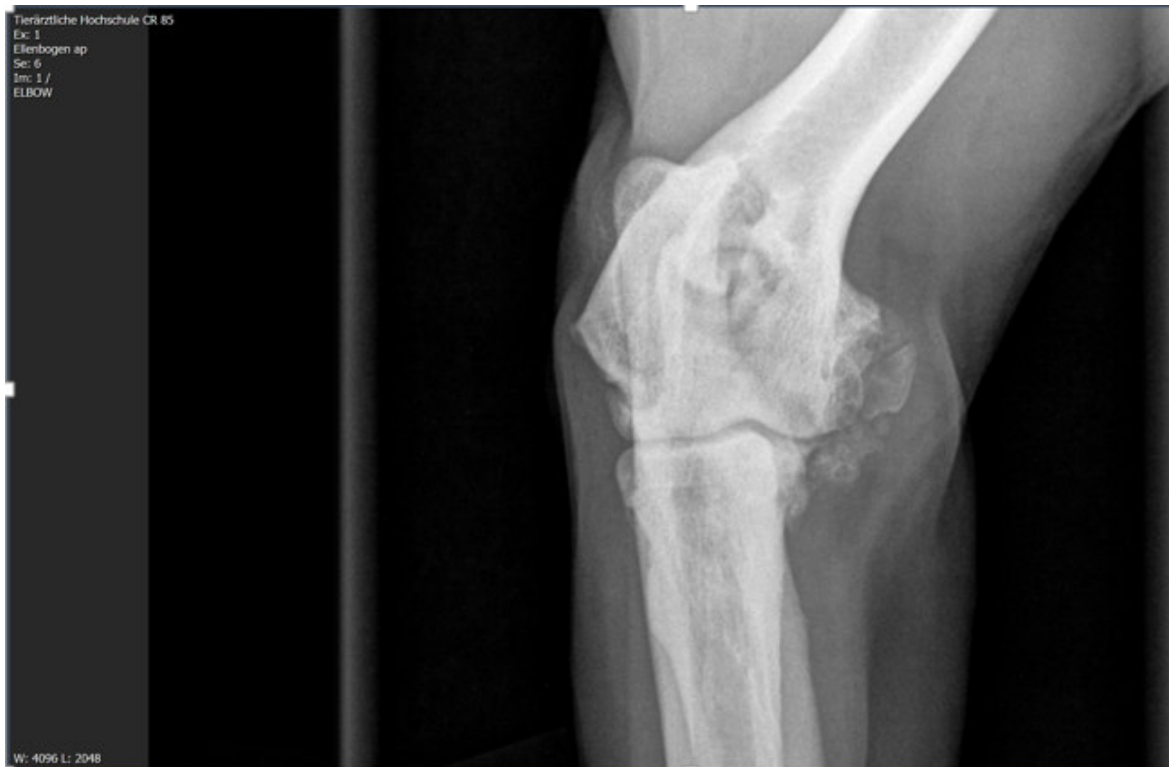

Radiograph of a right elbow in a craniocaudal view  
Grade 3: Severe arthrosis - Presence of osteophytes of  $> 5$  mm high (shown in the measurement).

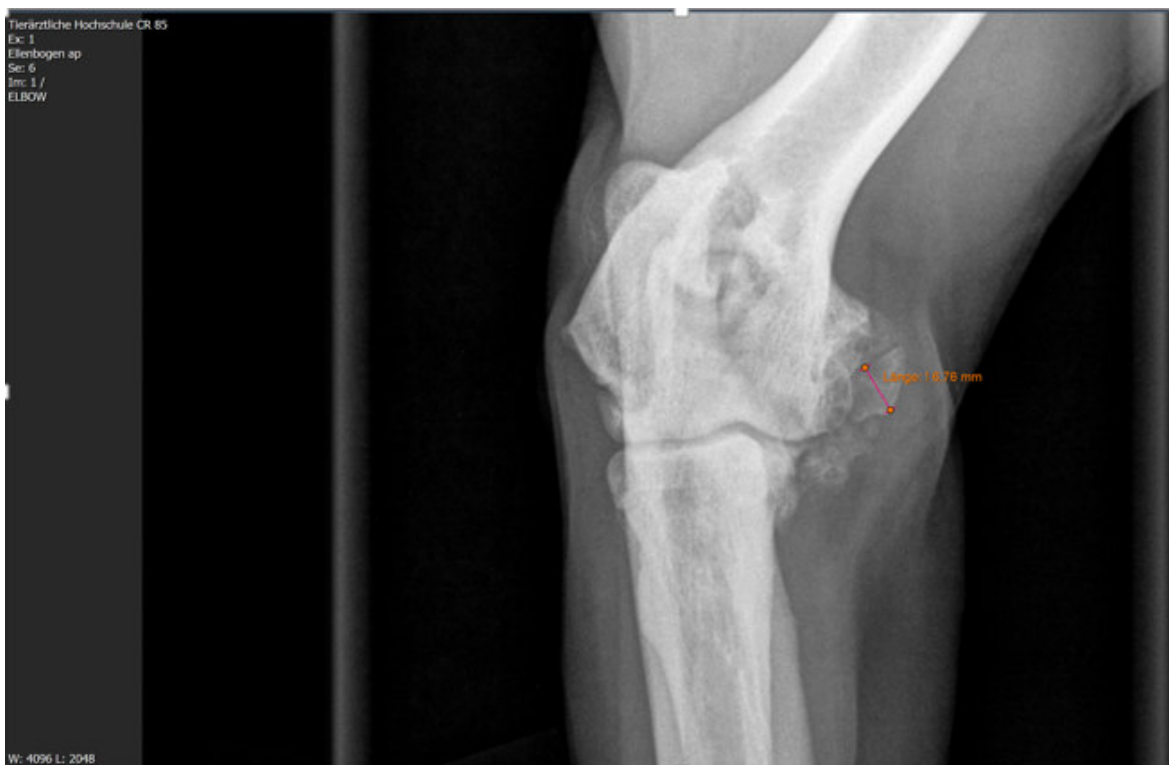



**Table 3.** Computed tomographic variables studied at the medial coronoid process (MCP)  
[16,27,28].

| Type of pathology present at MCP |                           | Type of fragmentation of the MCP |                                                           | Fragment dislocation |     |
|----------------------------------|---------------------------|----------------------------------|-----------------------------------------------------------|----------------------|-----|
| 1.                               | Single fragment           | 1.                               | Fragment or fissure along the radial incisure of the ulna | 1.                   | Yes |
| 2.                               | Multiple fragments        | 2.                               | Fragmentation affecting the MCP at the apex               | 2.                   | No  |
| 3.                               | Fissures                  | 3.                               | Radial incisures – Tip fragment or fissure (Combination)  |                      |     |
| 4.                               | Combination of lesions    |                                  |                                                           |                      |     |
| 5.                               | None of the above lesions |                                  |                                                           |                      |     |

**Type of pathology present at MCP:**

**CT of a right elbow; Single fragment (arrow)**

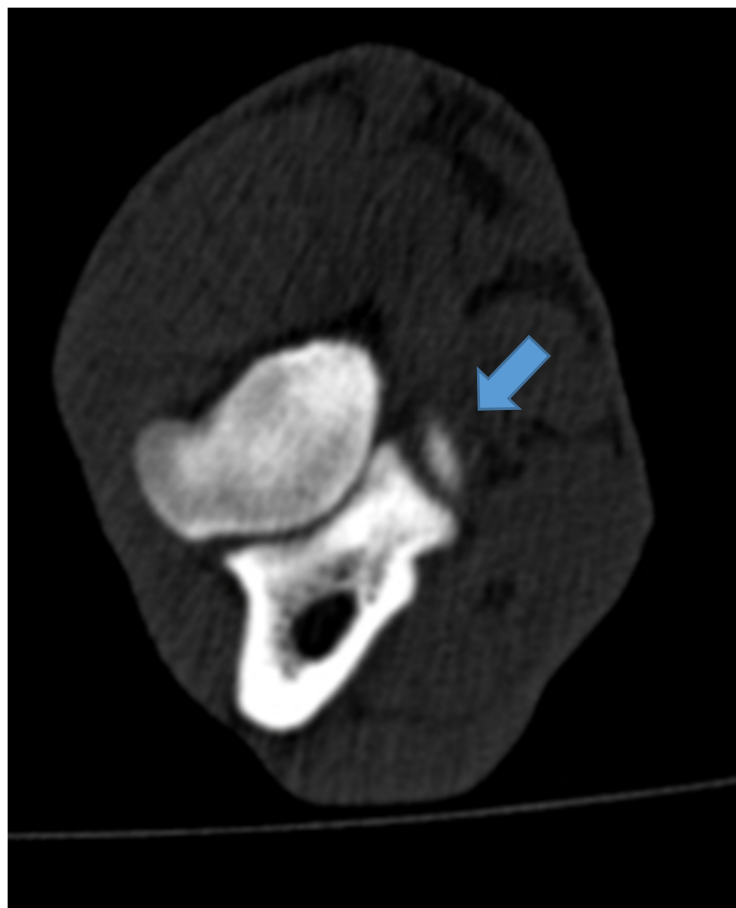

**CT of a right elbow; multiple fragments (arrow)**

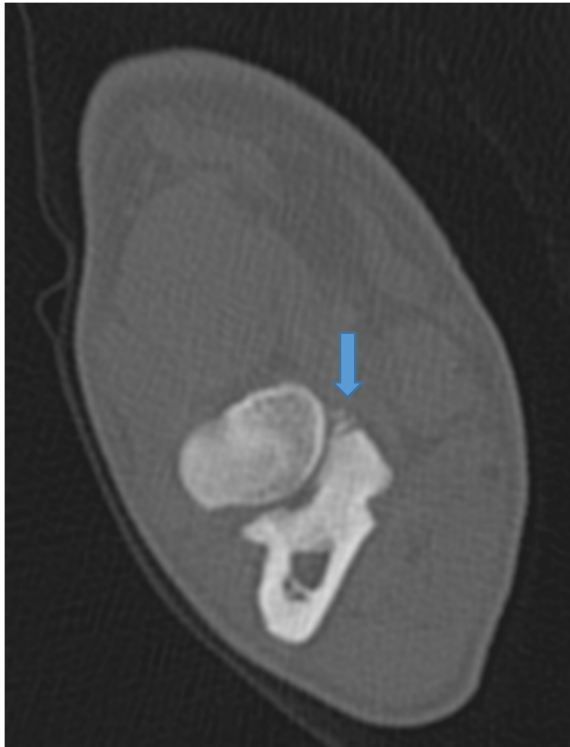

**CT of a right elbow; Fissure at the tip of the medial coronoid process (arrow)**

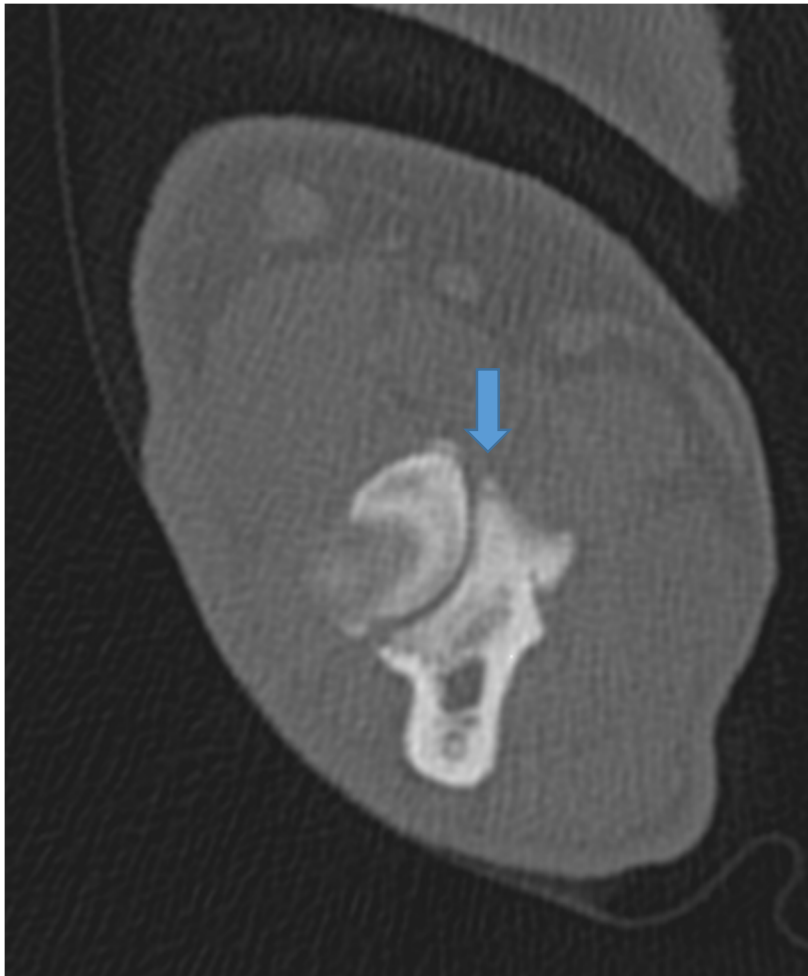

**Type of fragmentation of the MCP:**

**CT of a right elbow; Fragment or fissure along the radial incisure of the ulna (arrow)**

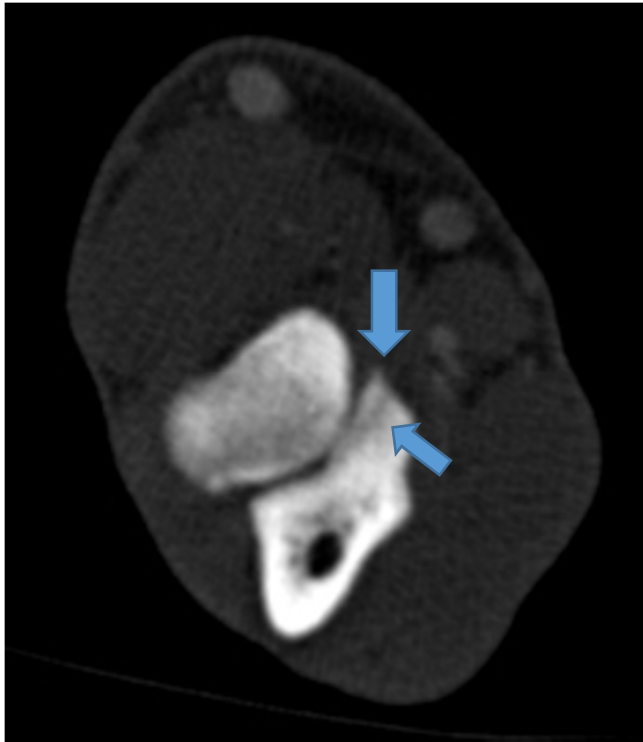

**CT of a left elbow; Tip fragment (arrow)**

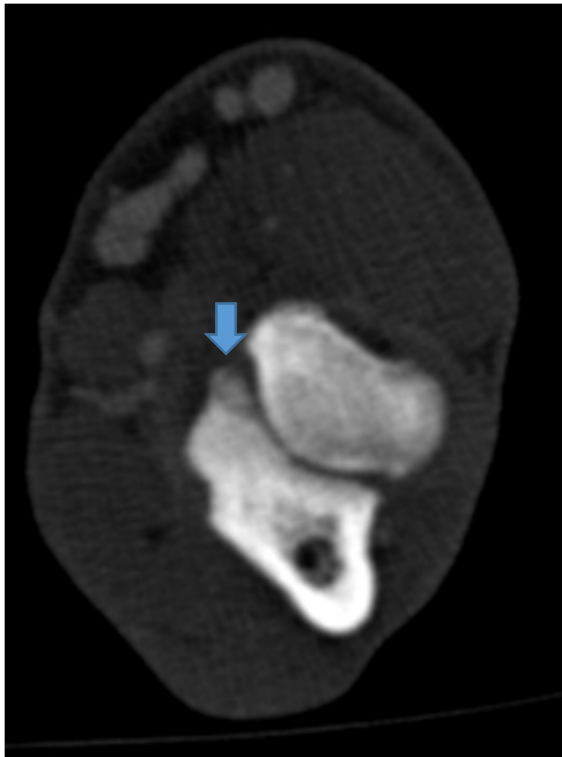

## **Fragment dislocation**

**CT of a left elbow; dislocated fragment (arrow)**

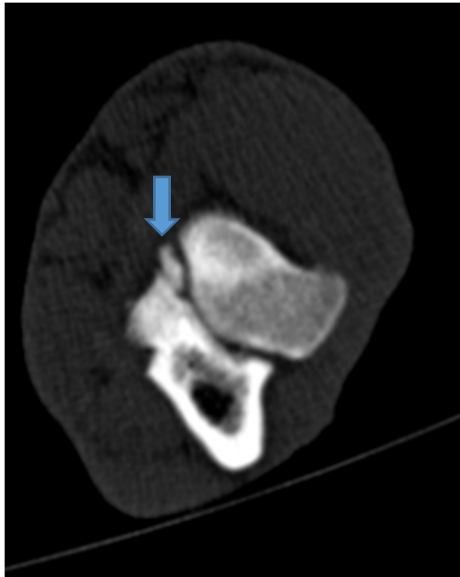

**CT of a right elbow; non-dislocated fragment (arrow)**

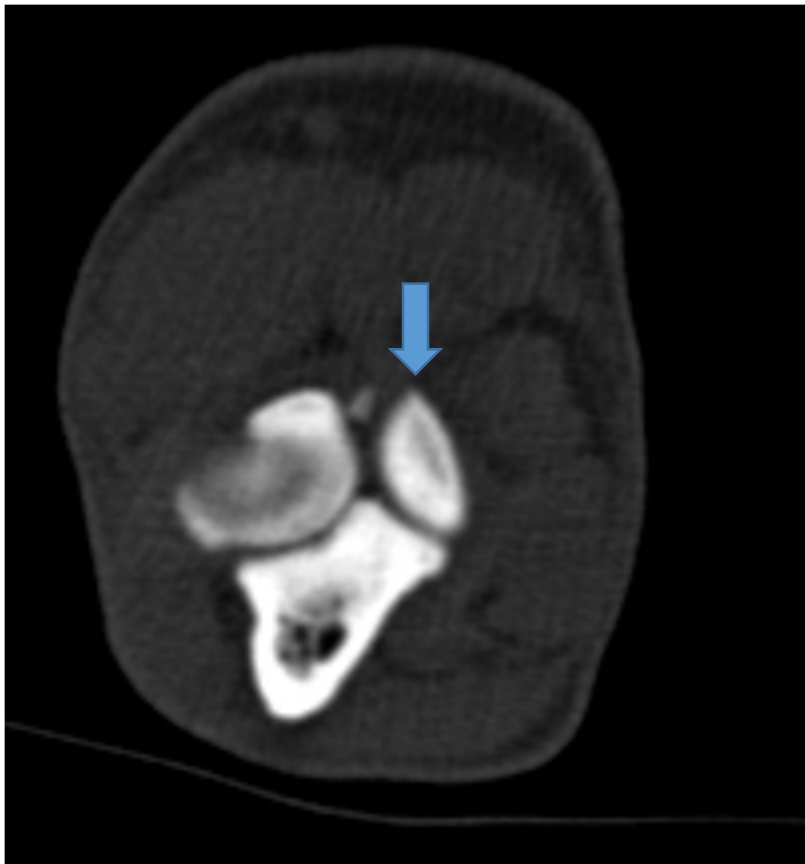

Supplement: s1 [file s1]
